# Supplementary material for: Customized deep learning for precipitation bias correction and downscaling
Source: Copernicus journal article supplement (doi:10.5194/gmd-16-535-2023), 2023-01-25
Supplement: Supplementary file 1 [file gmd-16-535-2023-supplement.pdf]

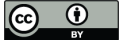

*Supplement of*

## **Customized deep learning for precipitation bias correction and downscaling**

**Fang Wang et al.**

*Correspondence to:* Di Tian ([tiandi@auburn.edu](mailto:tiandi@auburn.edu))

The copyright of individual parts of the supplement might differ from the article licence.

## Supplemental Tables

Table S1. Probability for each precipitation bin during training and testing periods and their difference.

| Precipitation Bin (mm/h) | Train (%) | Test (%) | Test-Train (%) |
|--------------------------|-----------|----------|----------------|
| 0-0.5                    | 95.637    | 94.377   | -1.261         |
| 0.5-1.0                  | 1.156     | 1.573    | 0.417          |
| 1.0-1.5                  | 0.671     | 0.921    | 0.250          |
| 1.5-2.0                  | 0.455     | 0.613    | 0.158          |
| 2.0-2.5                  | 0.333     | 0.443    | 0.109          |
| 2.5-3.0                  | 0.257     | 0.333    | 0.077          |
| 3.0-3.5                  | 0.206     | 0.261    | 0.055          |
| 3.5-4.0                  | 0.169     | 0.211    | 0.042          |
| 4.0-4.5                  | 0.140     | 0.172    | 0.032          |
| 4.5-5.0                  | 0.118     | 0.146    | 0.028          |
| 5.0-5.5                  | 0.100     | 0.118    | 0.018          |
| 5.5-6.0                  | 0.086     | 0.099    | 0.013          |
| 6.0-6.5                  | 0.074     | 0.084    | 0.010          |
| 6.5-7.0                  | 0.064     | 0.071    | 0.007          |
| 7.0-7.5                  | 0.056     | 0.063    | 0.007          |
| 7.5-8.0                  | 0.049     | 0.052    | 0.004          |
| 8.0-8.5                  | 0.043     | 0.045    | 0.002          |
| 8.5-9.0                  | 0.038     | 0.040    | 0.002          |
| 9.0-9.5                  | 0.033     | 0.035    | 0.002          |
| 9.5-10                   | 0.029     | 0.031    | 0.002          |
| >10                      | 0.287     | 0.313    | 0.027          |
| sum                      | 100.0     | 100.0    | 0.0            |

Table S2. Overall assessment for hourly, daily total, and monthly mean of hourly precipitation by running each scenario 4 times to consider stochastic nature of deep learning. The values outside and inside parenthesis are mean and standard deviation of the 4 runs, respectively. Significance evaluation is based on p-value 0.05 (i.e., mean  $\pm 2$ \* standard deviation confident intervals)

| Temporal scales                      | Scenarios* | KGE                 | r                 | $\beta$           | $\gamma$          | RMSE (mm)         | MAE (mm)          |
|--------------------------------------|------------|---------------------|-------------------|-------------------|-------------------|-------------------|-------------------|
| Hourly precipitation                 | Scenario1  | -0.0547<br>(0.0036) | 0.275<br>(0.0059) | 0.281<br>(0.0061) | 1.26<br>(0.016)   | 1.20<br>(0.0038)  | 0.188<br>(0.0012) |
|                                      | Scenario2  | 0.217<br>(0.0013)   | 0.295<br>(0.0070) | 0.960<br>(0.0086) | 0.660<br>(0.0128) | 1.25<br>(0.009)   | 0.259<br>(0.0011) |
|                                      | Scenario3  | 0.205<br>(0.0030)   | 0.285<br>(0.0055) | 1.01<br>(0.0074)  | 0.652<br>(0.0132) | 1.27<br>(0.010)   | 0.268<br>(0.0013) |
|                                      | Scenario4  | 0.248<br>(0.0017)   | 0.328<br>(0.0026) | 0.878<br>(0.029)  | 0.686<br>(0.0102) | 1.21<br>(0.005)   | 0.241<br>(0.0036) |
|                                      | Scenario5  | 0.282<br>(0.0016)   | 0.357<br>(0.0015) | 0.986<br>(0.028)  | 0.681<br>(0.0042) | 1.22<br>(0.009)   | 0.245<br>(0.0034) |
|                                      | Scenario6  | 0.264<br>(0.0036)   | 0.355<br>(0.0021) | 0.965<br>(0.072)  | 0.654<br>(0.0142) | 1.20<br>(0.013)   | 0.243<br>(0.0081) |
|                                      | QDM BI     | 0.248               | 0.332             | 1.02              | 1.35              | 1.36              | 0.256             |
| Daily precipitation                  | Scenario1  | 0.0791<br>(0.0126)  | 0.617<br>(0.0049) | 0.281<br>(0.0062) | 1.43<br>(0.023)   | 10.2<br>(0.03)    | 3.56<br>(0.009)   |
|                                      | Scenario2  | 0.642<br>(0.0034)   | 0.683<br>(0.0045) | 0.960<br>(0.0087) | 0.840<br>(0.0035) | 8.80<br>(0.06)    | 3.44<br>(0.020)   |
|                                      | Scenario3  | 0.629<br>(0.0046)   | 0.680<br>(0.0048) | 1.01<br>(0.0075)  | 0.814<br>(0.0079) | 8.87<br>(0.07)    | 3.52<br>(0.014)   |
|                                      | Scenario4  | 0.609<br>(0.011)    | 0.637<br>(0.0043) | 0.878<br>(0.030)  | 0.930<br>(0.013)  | 9.42<br>(0.04)    | 3.57<br>(0.044)   |
|                                      | Scenario5  | 0.689<br>(0.0020)   | 0.703<br>(0.0018) | 0.986<br>(0.028)  | 0.912<br>(0.0075) | 8.77<br>(0.10)    | 3.34<br>(0.055)   |
|                                      | Scenario6  | 0.666<br>(0.013)    | 0.698<br>(0.0045) | 0.965<br>(0.072)  | 0.876<br>(0.016)  | 8.70<br>(0.10)    | 3.32<br>(0.080)   |
|                                      | QDM BI     | 0.644               | 0.689             | 1.02              | 1.17              | 10.50             | 3.42              |
| Monthly mean of hourly precipitation | Scenario1  | -0.0076<br>(0.0191) | 0.559<br>(0.0081) | 0.282<br>(0.0062) | 1.55<br>(0.025)   | 0.164<br>(0.0011) | 0.134<br>(0.0011) |
|                                      | Scenario2  | 0.768<br>(0.0071)   | 0.779<br>(0.0087) | 0.961<br>(0.0088) | 0.946<br>(0.013)  | 0.072<br>(0.0016) | 0.051<br>(0.0011) |
|                                      | Scenario3  | 0.772<br>(0.0090)   | 0.785<br>(0.0072) | 1.01<br>(0.0076)  | 0.927<br>(0.017)  | 0.072<br>(0.0010) | 0.051<br>(0.0006) |
|                                      | Scenario4  | 0.675<br>(0.017)    | 0.700<br>(0.0092) | 0.878<br>(0.029)  | 0.986<br>(0.012)  | 0.085<br>(0.0018) | 0.060<br>(0.0009) |
|                                      | Scenario5  | 0.776<br>(0.0033)   | 0.778<br>(0.0027) | 0.987<br>(0.028)  | 0.980<br>(0.015)  | 0.074<br>(0.0002) | 0.052<br>(0.0003) |
|                                      | Scenario6  | 0.765<br>(0.019)    | 0.779<br>(0.0090) | 0.964<br>(0.072)  | 0.966<br>(0.016)  | 0.074<br>(0.0016) | 0.052<br>(0.0011) |
|                                      | QDM BI     | 0.717               | 0.777             | 1.02              | 1.17              | 0.0850            | 0.0553            |

\*Scenarios have different settings: Scenario1 is with a regular MAE loss function and coarse precipitation as a predictor; Scenario2 is with a weighted MAE loss and coarse precipitation as a predictor; Scenario3 is the same as Scenario2 except with a classification as an auxiliary task; Scenario4 is with a weighted loss function and covariates as predictors; Scenario5 is the same as Scenario4 except also including coarse precipitation as predictors; Scenario 6 is the same as Scenario5 but including a classification as an auxiliary task.

Table S3. Performance of extreme indices including hourly  $P$  at 99% percentile and annual maximum wet spell in hours by running each scenario 4 times to consider stochastic nature of deep learning. The values outside and inside parenthesis are mean and standard deviation of the 4 runs, respectively.

| Extreme indices                        | Scenarios* | KGE               | r                 | $\beta$          | $\gamma$         | RMSE             | MAE             |
|----------------------------------------|------------|-------------------|-------------------|------------------|------------------|------------------|-----------------|
| 99th percentile<br>(mm)                | Scenario1  | -1.47<br>(0.180)  | 0.330<br>(0.036)  | 0.355<br>(0.004) | 3.29<br>(0.190)  | 3.17<br>(0.018)  | 3.12<br>(0.020) |
|                                        | Scenario2  | 0.358<br>(0.030)  | 0.422<br>(0.028)  | 0.806<br>(0.006) | 1.19<br>(0.074)  | 1.07<br>(0.020)  | 0.96<br>(0.027) |
|                                        | Scenario3  | 0.255<br>(0.016)  | 0.283<br>(0.016)  | 0.826<br>(0.010) | 1.08<br>(0.069)  | 1.01<br>(0.032)  | 0.89<br>(0.032) |
|                                        | Scenario4  | 0.202<br>(0.015)  | 0.240<br>(0.022)  | 0.765<br>(0.017) | 1.02<br>(0.070)  | 1.25<br>(0.077)  | 1.15<br>(0.082) |
|                                        | Scenario5  | 0.265<br>(0.008)  | 0.293<br>(0.008)  | 0.837<br>(0.026) | 1.11<br>(0.051)  | 0.969<br>(0.104) | 0.85<br>(0.108) |
|                                        | Scenario6  | 0.238<br>(0.009)  | 0.274<br>(0.0037) | 0.808<br>(0.055) | 1.11<br>(0.051)  | 0.981<br>(0.042) | 0.87<br>(0.055) |
|                                        | QDM_BI     | 0.158             | 0.244             | 0.900            | 1.36             | 0.793            | 0.655           |
| Annual<br>maximum wet<br>spell (hours) | Scenario1  | 0.156<br>(0.0028) | 0.308<br>(0.0247) | 0.645<br>(0.016) | 1.32<br>(0.071)  | 11.7<br>(0.35)   | 9.77<br>(0.34)  |
|                                        | Scenario2  | 0.311<br>(0.028)  | 0.320<br>(0.023)  | 1.10<br>(0.040)  | 0.999<br>(0.018) | 9.26<br>(0.85)   | 7.06<br>(0.60)  |
|                                        | Scenario3  | 0.273<br>(0.012)  | 0.282<br>(0.014)  | 1.09<br>(0.022)  | 1.01<br>(0.070)  | 9.24<br>(0.22)   | 7.02<br>(0.064) |
|                                        | Scenario4  | 0.125<br>(0.008)  | 0.248<br>(0.023)  | 1.40<br>(0.048)  | 1.20<br>(0.037)  | 16.3<br>(1.2)    | 12.0<br>(0.64)  |
|                                        | Scenario5  | 0.186<br>(0.013)  | 0.319<br>(0.017)  | 1.43<br>(0.010)  | 1.10<br>(0.010)  | 15.6<br>(0.24)   | 11.9<br>(0.22)  |
|                                        | Scenario6  | 0.151<br>(0.0049) | 0.288<br>(0.018)  | 1.43<br>(0.032)  | 1.16<br>(0.020)  | 16.0<br>(1.13)   | 11.9<br>(0.70)  |
|                                        | QDM_BI     | -0.209            | 0.173             | 1.88             | 1.09             | 26.6             | 22.2            |

\*Scenarios have different settings: Scenario1 is with a regular MAE loss function and coarse precipitation as a predictor; Scenario2 is with a weighted MAE loss and coarse precipitation as a predictor; Scenario3 is the same as Scenario2 except with a classification as an auxiliary task; Scenario4 is with a weighted loss function and covariates as predictors; Scenario5 is the same as Scenario4 except also including coarse precipitation as predictors; Scenario 6 is the same as Scenario5 but including a classification as an auxiliary task.

Supplemental Figures

Learning Curves

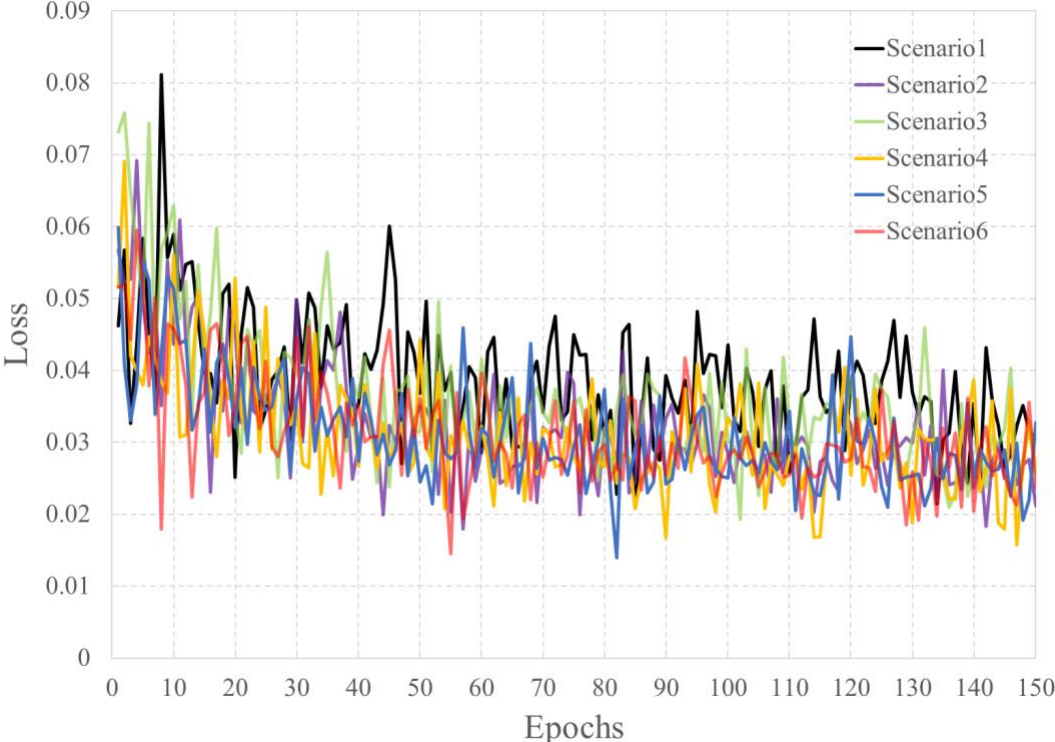

Figure S1. Learning curves for the 6 scenarios
